# Supplementary material for: Cleavable linkers and their application in MS-based target identification
Source: Royal Society of Chemistry journal article supplement (doi:10.1039/d0mo00181c), 2021-01-21
Supplement: d0mo00181c2.pdf [file d0mo00181c2.pdf]

**TABLE S2: Photocleavable linkers**

| Cleavable linker                                                     | Structure                                                                          | Cleavage products                                                                   | Cleavage Conditions | Advantages                                                                                                                            | Disadvantages                                                        |
|----------------------------------------------------------------------|------------------------------------------------------------------------------------|-------------------------------------------------------------------------------------|---------------------|---------------------------------------------------------------------------------------------------------------------------------------|----------------------------------------------------------------------|
| Phenacyl ester <sup>1</sup>                                          | 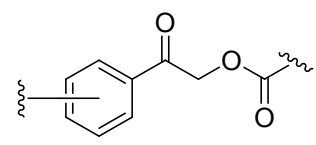  |   | 254 nm              | Stable under variety of chemical conditions. <sup>a</sup><br>Also no additional reagents needed which might affect system under study | Short wavelengths potentially damaging to proteins and nucleic acids |
| Benzoin ester <sup>2</sup>                                           |   |   | 365 nm              | Longer wavelengths not damaging to proteins. <sup>b</sup><br>Stable to visible light, stable to CuAAC conditions                      | But not orthogonal to PAL groups e.g. BP, diazirine <sup>c</sup>     |
| O-nitrobenzyl carbamate <sup>3, 4 5,6</sup><br>(also amides, esters) |  |  | 365 nm              |                                                                                                                                       | Produces reactive nitrosobenzene derivative following cleavage       |

<sup>a</sup> True for all photocleavable linkers.

<sup>b,c</sup> True for all photocleavable linkers that require 365 nm hv for cleavage.

|                                                                                                                                                                                                                 |                                                                                                                                                          |        |                                                                                                                       |                                         |
|-----------------------------------------------------------------------------------------------------------------------------------------------------------------------------------------------------------------|----------------------------------------------------------------------------------------------------------------------------------------------------------|--------|-----------------------------------------------------------------------------------------------------------------------|-----------------------------------------|
| <p><math>\alpha</math>-hydroxycinnamate<sup>7</sup></p> 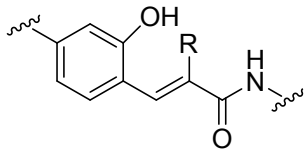 <p>R = CH<sub>2</sub>Cl<sub>3</sub>, CD<sub>2</sub>CD<sub>3</sub></p> |  <p>R = CH<sub>2</sub>Cl<sub>3</sub>, CD<sub>2</sub>CD<sub>3</sub></p> | 365 nm | Coumarin fluorophore is produced upon cleavage = FL-tagged target<br>Isotope-coded FL tag aids ID of labeled peptides |                                         |
| <p><math>\alpha</math>-thioacetophenone<sup>8</sup></p>                                                                        |                                                                        | 365 nm | Longer wavelengths not damaging to proteins/ nucleic acids                                                            | Produces thiol, which may further react |

- 1 R. Orth and S. A. Sieber, *J. Org. Chem.*, 2009, **74**, 8476–8479.
- 2 H. Y. Kim, K. A. Tallman, D. C. Liebler and N. A. Porter, *Mol Cell Proteomics*, 2009, **8**, 2080–2089.
- 3 J. Olejnik, S. Sonar, E. Krzymanska-Olejnik and K. J. Rothschild, *Proc. Natl. Acad. Sci. U. S. A.*, 1995, **92**, 7590–7594.
- 4 J. Szychowski, A. Mahdavi, J. J. Hodas, J. D. Bagert, J. T. Ngo, P. Landgraf, D. C. Dieterich, E. M. Schuman and D. A. Tirrell, *J. Am. Chem. Soc.*, 2010, **132**, 18351–18360.
- 5 T. C. Chang, A. K. Adak, T. W. Lin, P. J. Li, Y. J. Chen, C. H. Lai, C. F. Liang, Y. J. Chen and C. C. Lin, *Bioorganic Med. Chem.*, 2016, **24**, 1216–1224.
- 6 J. Li, Z. Li, X. Duan, K. Qin, L. Dang, S. Sun, L. Cai, L. C. Hsieh-Wilson, L. Wu and W. Yi, *ACS Chem. Biol.*, 2019, **14**, 4–10.
- 7 T. Tomohiro, S. Morimoto, T. Shima, J. Chiba and Y. Hatanaka, *Angew. Chemie - Int. Ed.*, 2014, **53**, 13502–13505.
- 8 H. Yonezawa, Y. Nishiyama, K. Takeo, T. Iwatsubo, T. Tomita, S. Yokoshima and T. Fukuyama, *Bioorganic Med. Chem. Lett.*, 2014, **24**, 2831–2833.
